# Supplementary material for: Risk and protective factors for post-traumatic stress among New Zealand military personnel: A cross sectional study
Source: PubMed Central journal article supplement (PMC7164978; doi:10.1371/journal.pone.0231460), 2020-04-17

# PLOS ONE

## Post-Traumatic Stress among New Zealand military personnel: a cross sectional study --Manuscript Draft--

|                              |                                                                                                                                                                                                                                                                                                                                                                                                                                                                                                                                                                                                                                                                                                                                                                                                                                                                                                                                                                                                                                                                                                                                                                                                                                                                                                                                                                                                                                                                                                                                                                                                                                                                                                                                                                                                                                                                                                                                                                                                                                              |
|------------------------------|----------------------------------------------------------------------------------------------------------------------------------------------------------------------------------------------------------------------------------------------------------------------------------------------------------------------------------------------------------------------------------------------------------------------------------------------------------------------------------------------------------------------------------------------------------------------------------------------------------------------------------------------------------------------------------------------------------------------------------------------------------------------------------------------------------------------------------------------------------------------------------------------------------------------------------------------------------------------------------------------------------------------------------------------------------------------------------------------------------------------------------------------------------------------------------------------------------------------------------------------------------------------------------------------------------------------------------------------------------------------------------------------------------------------------------------------------------------------------------------------------------------------------------------------------------------------------------------------------------------------------------------------------------------------------------------------------------------------------------------------------------------------------------------------------------------------------------------------------------------------------------------------------------------------------------------------------------------------------------------------------------------------------------------------|
| <b>Manuscript Number:</b>    | PONE-D-19-23666                                                                                                                                                                                                                                                                                                                                                                                                                                                                                                                                                                                                                                                                                                                                                                                                                                                                                                                                                                                                                                                                                                                                                                                                                                                                                                                                                                                                                                                                                                                                                                                                                                                                                                                                                                                                                                                                                                                                                                                                                              |
| <b>Article Type:</b>         | Research Article                                                                                                                                                                                                                                                                                                                                                                                                                                                                                                                                                                                                                                                                                                                                                                                                                                                                                                                                                                                                                                                                                                                                                                                                                                                                                                                                                                                                                                                                                                                                                                                                                                                                                                                                                                                                                                                                                                                                                                                                                             |
| <b>Full Title:</b>           | Post-Traumatic Stress among New Zealand military personnel: a cross sectional study                                                                                                                                                                                                                                                                                                                                                                                                                                                                                                                                                                                                                                                                                                                                                                                                                                                                                                                                                                                                                                                                                                                                                                                                                                                                                                                                                                                                                                                                                                                                                                                                                                                                                                                                                                                                                                                                                                                                                          |
| <b>Short Title:</b>          | PTSD in New Zealand Veterans                                                                                                                                                                                                                                                                                                                                                                                                                                                                                                                                                                                                                                                                                                                                                                                                                                                                                                                                                                                                                                                                                                                                                                                                                                                                                                                                                                                                                                                                                                                                                                                                                                                                                                                                                                                                                                                                                                                                                                                                                 |
| <b>Corresponding Author:</b> | David McBride<br>University of Otago<br>Dunedin, Otago NEW ZEALAND                                                                                                                                                                                                                                                                                                                                                                                                                                                                                                                                                                                                                                                                                                                                                                                                                                                                                                                                                                                                                                                                                                                                                                                                                                                                                                                                                                                                                                                                                                                                                                                                                                                                                                                                                                                                                                                                                                                                                                           |
| <b>Keywords:</b>             | Military Personnel; Post-Traumatic Stress (PTS); Psychological Flexibility; Sleep; Trauma                                                                                                                                                                                                                                                                                                                                                                                                                                                                                                                                                                                                                                                                                                                                                                                                                                                                                                                                                                                                                                                                                                                                                                                                                                                                                                                                                                                                                                                                                                                                                                                                                                                                                                                                                                                                                                                                                                                                                    |
| <b>Abstract:</b>             | <p><b>Background</b></p> <p>Post-traumatic stress (PTS) is prevalent among military personnel. Knowledge of the protective and harmful factors associated with PTS in this population may assist with identifying personnel who would benefit from increased or targeted support.</p> <p><b>Aims</b></p> <p>To examine factors associated with PTS among New Zealand military personnel.</p> <p><b>Methods</b></p> <p>For this cross-sectional study, currently serving and retired military personnel were invited to complete a questionnaire. The questionnaire included a measure of PTS (the Military Post-traumatic Stress Disorder Checklist; PCL-M), where scores <math>\geq 30</math> indicate the experience of significant PTS symptoms and scores <math>\geq 45</math> indicate a presumptive clinical diagnosis of post-traumatic stress. Potentially protective and harmful factors associated with PTS were examined using logistic regression modelling.</p> <p><b>Results</b></p> <p>1817 military personnel completed the questionnaire. PCL-M scores were <math>\geq 30</math> for 549 (30%) participants and <math>\geq 45</math> for 179 (10%) participants. Exposure to trauma was most strongly associated with PCL-M scores <math>\geq 45</math> (OR 3.34, 95% CI 1.54-7.27, <math>p &lt; 0.01</math>). Higher PCL-M scores were also associated with older age, male sex, and Māori ethnicity (New Zealand's indigenous population). Factors associated with lower PCL-M scores were greater length of service, psychological flexibility, and better quality sleep.</p> <p><b>Conclusions</b></p> <p>PTS was found to be prevalent among New Zealand military personnel. The experience of trauma was strongly associated with PTS. However, factors such as psychological flexibility (the ability to adapt to changes in circumstances) and good sleep were protective, suggesting that these factors could be key targets for interventions designed to reduce PTS among military personnel in New Zealand.</p> |
| <b>Order of Authors:</b>     | Amy Richardson<br>Gagan Gurung<br>Ari Samaranayaka<br>Dianne Gardner<br>Brandon deGraaf<br>Emma H. Wyeth<br>Sarah Derrett                                                                                                                                                                                                                                                                                                                                                                                                                                                                                                                                                                                                                                                                                                                                                                                                                                                                                                                                                                                                                                                                                                                                                                                                                                                                                                                                                                                                                                                                                                                                                                                                                                                                                                                                                                                                                                                                                                                    |

|                                                                                                                                                                                                                                                                                                                                                                                                                                                                                                                                                                                                                                                                                                                                                                                                                                                                                                                                                                                                                                                                                                                                                                                                                                                                                                                                                                                     |                                                                                                                                                                                                                                                                                                                                                                                                                                                                                                                                  |
|-------------------------------------------------------------------------------------------------------------------------------------------------------------------------------------------------------------------------------------------------------------------------------------------------------------------------------------------------------------------------------------------------------------------------------------------------------------------------------------------------------------------------------------------------------------------------------------------------------------------------------------------------------------------------------------------------------------------------------------------------------------------------------------------------------------------------------------------------------------------------------------------------------------------------------------------------------------------------------------------------------------------------------------------------------------------------------------------------------------------------------------------------------------------------------------------------------------------------------------------------------------------------------------------------------------------------------------------------------------------------------------|----------------------------------------------------------------------------------------------------------------------------------------------------------------------------------------------------------------------------------------------------------------------------------------------------------------------------------------------------------------------------------------------------------------------------------------------------------------------------------------------------------------------------------|
|                                                                                                                                                                                                                                                                                                                                                                                                                                                                                                                                                                                                                                                                                                                                                                                                                                                                                                                                                                                                                                                                                                                                                                                                                                                                                                                                                                                     | Daniel Shepherd                                                                                                                                                                                                                                                                                                                                                                                                                                                                                                                  |
|                                                                                                                                                                                                                                                                                                                                                                                                                                                                                                                                                                                                                                                                                                                                                                                                                                                                                                                                                                                                                                                                                                                                                                                                                                                                                                                                                                                     | David McBride                                                                                                                                                                                                                                                                                                                                                                                                                                                                                                                    |
| <b>Opposed Reviewers:</b>                                                                                                                                                                                                                                                                                                                                                                                                                                                                                                                                                                                                                                                                                                                                                                                                                                                                                                                                                                                                                                                                                                                                                                                                                                                                                                                                                           |                                                                                                                                                                                                                                                                                                                                                                                                                                                                                                                                  |
| <b>Additional Information:</b>                                                                                                                                                                                                                                                                                                                                                                                                                                                                                                                                                                                                                                                                                                                                                                                                                                                                                                                                                                                                                                                                                                                                                                                                                                                                                                                                                      |                                                                                                                                                                                                                                                                                                                                                                                                                                                                                                                                  |
| <b>Question</b>                                                                                                                                                                                                                                                                                                                                                                                                                                                                                                                                                                                                                                                                                                                                                                                                                                                                                                                                                                                                                                                                                                                                                                                                                                                                                                                                                                     | <b>Response</b>                                                                                                                                                                                                                                                                                                                                                                                                                                                                                                                  |
| <p><b>Financial Disclosure</b></p> <p>Enter a financial disclosure statement that describes the sources of funding for the work included in this submission. Review the <a href="#">submission guidelines</a> for detailed requirements. View published research articles from <a href="#">PLOS ONE</a> for specific examples.</p> <p>This statement is required for submission and <b>will appear in the published article</b> if the submission is accepted. Please make sure it is accurate.</p> <p><b>Unfunded studies</b><br/>Enter: <i>The author(s) received no specific funding for this work.</i></p> <p><b>Funded studies</b><br/>Enter a statement with the following details:</p> <ul style="list-style-type: none"> <li>• Initials of the authors who received each award</li> <li>• Grant numbers awarded to each author</li> <li>• The full name of each funder</li> <li>• URL of each funder website</li> <li>• Did the sponsors or funders play any role in the study design, data collection and analysis, decision to publish, or preparation of the manuscript?</li> <li>• <b>NO</b> - Include this sentence at the end of your statement: <i>The funders had no role in study design, data collection and analysis, decision to publish, or preparation of the manuscript.</i></li> <li>• <b>YES</b> - Specify the role(s) played.</li> </ul> <p>* typeset</p> | <p>Authors with funding:DI, AR, AS<br/> Funders:Veterans Medical Research Trust Fund (No website)<br/> Lottery Health<br/> <a href="https://www.communitymatters.govt.nz/lottery-health-research/">https://www.communitymatters.govt.nz/lottery-health-research/</a><br/> The Royal New Zealand Returned and Services Association<br/> <a href="http://www.rsa.org.nz">www.rsa.org.nz</a><br/> The funders had no role in study design, data collection and analysis, decision to publish, or preparation of the manuscript.</p> |
| <p><b>Competing Interests</b></p> <p>Use the instructions below to enter a competing interest statement for this submission. On behalf of all authors, disclose any <a href="#">competing interests</a> that could be perceived to bias this</p>                                                                                                                                                                                                                                                                                                                                                                                                                                                                                                                                                                                                                                                                                                                                                                                                                                                                                                                                                                                                                                                                                                                                    | <p>The authors have declared that no competing interests exist.</p>                                                                                                                                                                                                                                                                                                                                                                                                                                                              |

work—acknowledging all financial support and any other relevant financial or non-financial competing interests.

This statement **will appear in the published article** if the submission is accepted. Please make sure it is accurate. View published research articles from [PLOS ONE](#) for specific examples.

**NO authors have competing interests**

Enter: *The authors have declared that no competing interests exist.*

**Authors with competing interests**

Enter competing interest details beginning with this statement:

*I have read the journal's policy and the authors of this manuscript have the following competing interests: [insert competing interests here]*

\* typeset

**Ethics Statement**

Enter an ethics statement for this submission. This statement is required if the study involved:

- Human participants
- Human specimens or tissue
- Vertebrate animals or cephalopods
- Vertebrate embryos or tissues
- Field research

Write "N/A" if the submission does not require an ethics statement.

General guidance is provided below. Consult the [submission guidelines](#) for detailed instructions. **Make sure that all information entered here is included in the Methods section of the manuscript.**

Southern Health and Disability Ethics Committee of New Zealand (15/STH/40/AM02).

**Format for specific study types**

**Human Subject Research (involving human participants and/or tissue)**

- Give the name of the institutional review board or ethics committee that approved the study
- Include the approval number and/or a statement indicating approval of this research
- Indicate the form of consent obtained (written/oral) or the reason that consent was not obtained (e.g. the data were analyzed anonymously)

**Animal Research (involving vertebrate animals, embryos or tissues)**

- Provide the name of the Institutional Animal Care and Use Committee (IACUC) or other relevant ethics board that reviewed the study protocol, and indicate whether they approved this research or granted a formal waiver of ethical approval
- Include an approval number if one was obtained
- If the study involved *non-human primates*, add *additional details* about animal welfare and steps taken to ameliorate suffering
- If anesthesia, euthanasia, or any kind of animal sacrifice is part of the study, include briefly which substances and/or methods were applied

**Field Research**

Include the following details if this study involves the collection of plant, animal, or other materials from a natural setting:

- Field permit number
- Name of the institution or relevant body that granted permission

**Data Availability**

Authors are required to make all data underlying the findings described fully available, without restriction, and from the time of publication. PLOS allows rare exceptions to address legal and ethical concerns. See the [PLOS Data Policy](#) and [FAQ](#) for detailed information.

No - some restrictions will apply

A Data Availability Statement describing where the data can be found is required at submission. Your answers to this question constitute the Data Availability Statement and **will be published in the article**, if accepted.

**Important:** Stating 'data available on request from the author' is not sufficient. If your data are only available upon request, select 'No' for the first question and explain your exceptional situation in the text box.

Do the authors confirm that all data underlying the findings described in their manuscript are fully available without restriction?

**Describe where the data may be found in full sentences. If you are copying our sample text, replace any instances of XXX with the appropriate details.**

- If the data are **held or will be held in a public repository**, include URLs, accession numbers or DOIs. If this information will only be available after acceptance, indicate this by ticking the box below. For example: *All XXX files are available from the XXX database (accession number(s) XXX, XXX).*
- If the data are all contained **within the manuscript and/or Supporting Information files**, enter the following:  
*All relevant data are within the manuscript and its Supporting Information files.*
- If neither of these applies but you are able to provide **details of access elsewhere**, with or without limitations, please do so. For example:

*Data cannot be shared publicly because of [XXX]. Data are available from the XXX Institutional Data Access / Ethics Committee (contact via XXX) for researchers who meet the criteria for access to confidential data.*

*The data underlying the results presented in the study are available from (include the name of the third party*

All relevant data are within the manuscript and its Supporting Information files.

|                                                                                                                                                                                                                                         |                                                                                                                                                                                  |
|-----------------------------------------------------------------------------------------------------------------------------------------------------------------------------------------------------------------------------------------|----------------------------------------------------------------------------------------------------------------------------------------------------------------------------------|
| <p><i>and contact information or URL).</i></p> <ul style="list-style-type: none"><li>• This text is appropriate if the data are owned by a third party and authors do not have permission to share the data.</li></ul> <p>* typeset</p> |                                                                                                                                                                                  |
| Additional data availability information:                                                                                                                                                                                               | Tick here if the URLs/accession numbers/DOIs will be available only after acceptance of the manuscript for publication so that we can ensure their inclusion before publication. |

UNIVERSITY  
of  
OTAGO

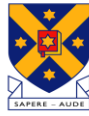

*Te Whare Wānanga o Otago*

22 August 2019.

Preventive and Social Medicine,  
University of Otago.

Dear Editors,

Kia ora,

We are submitting this article to PLoS One because it highlights risk and protective factors for post-traumatic stress, an important condition worldwide, and prevalent in our veteran community. Non-deployed veterans were included, so the risk factors include not only deployment related trauma, but trauma from other life events in the military setting. We have found that good sleep and resilience are both protective, which facts will help with prevention and treatment.

Some previously published work has looked at these conditions but have not taken such a holistic view.

Coming from New Zealand, the population in this cross sectional study is small, but our response rate compares favourably with other veteran studies: they can be difficult to engage with. Our strength lies in having veterans on the team. We also include findings from our Māori indigenous population, relatively well represented in the sample.

We have not previously submitted it to PLOS or any other journal.

The appropriate Academic Editors would be:

Erin Bouldin

Ann Marie Cheney

Briony Hill or;

Tracey Weiland

We have no opposing reviewers.

Ngā mihi,

Dave McBride on behalf of the team

---

Tel 64 3 479 7208 • Fax 64 3 479 7298 • Mobile 64 27 253 5451

Email [david.mcbride@otago.ac.nz](mailto:david.mcbride@otago.ac.nz)

[www.otago.ac.nz](http://www.otago.ac.nz)

1 **Post-Traumatic Stress among New Zealand military**  
2 **personnel: a cross sectional study**

3

4 Amy Richardson (BA, PGDipSci, PhD),<sup>1</sup> Gagan Gurung (PhD),<sup>2</sup> Ari Samaranayaka (BSc, MPhil, PhD),<sup>3</sup>  
5 Dianne Gardner (PhD),<sup>4</sup> Brandon deGraaf (BSc),<sup>1</sup> Emma H. Wyeth (BSc(Hons), PhD),<sup>5</sup> Sarah Derrett (BA,  
6 MPH, PhD),<sup>1</sup> Daniel Shepherd (BA, MSc, PhD)<sup>6</sup>, David McBride (MB BCh BAO, PhD)<sup>1\*</sup>

7 <sup>1</sup>Injury Prevention Research Unit, Department of Preventive and Social Medicine, Dunedin School of Medicine,  
8 University of Otago, New Zealand

9

10 <sup>2</sup>Department of Preventive and Social Medicine, Dunedin School of Medicine, University of Otago, New Zealand

11

12 <sup>3</sup>Centre for Biostatistics, Division of Health Sciences, University of Otago, New Zealand

13

14 <sup>4</sup>School of Psychology, Massey University, New Zealand

15

16 <sup>5</sup>Ngāi Tahu Māori Health Research Unit, Department of Preventive and Social Medicine, Dunedin School of  
17 Medicine, University of Otago, New Zealand

18

19 <sup>6</sup>Department of Psychology, Auckland University of Technology, New Zealand

20

21

22

23

24

25

26

27

28

29

30

31

32

Corresponding Author:

33

34

35

Email: [david.mcbride@otago.ac.nz](mailto:david.mcbride@otago.ac.nz)

36

Phone: 64 3 479 7208

37

38

39

40

41

42

43

44

45



## 36 **Abstract**

37 Background: Post-traumatic stress (PTS) is prevalent among military personnel. Knowledge of the  
38 protective and harmful factors associated with PTS in this population may assist with identifying  
39 personnel who would benefit from increased or targeted support.

40 Aims: To examine factors associated with PTS among New Zealand military personnel.

41 Methods: For this cross-sectional study, currently serving and retired military personnel were invited  
42 to complete a questionnaire. The questionnaire included a measure of PTS (the Military Post-  
43 traumatic Stress Disorder Checklist; PCL-M), where scores  $\geq 30$  indicate the experience of significant  
44 PTS symptoms and scores  $\geq 45$  indicate a presumptive clinical diagnosis of post-traumatic stress.  
45 Potentially protective and harmful factors associated with PTS were examined using logistic regression  
46 modelling.

47 Results: 1817 military personnel completed the questionnaire. PCL-M scores were  $\geq 30$  for 549 (30%)  
48 participants and  $\geq 45$  for 179 (10%) participants. Exposure to trauma was most strongly associated with  
49 PCL-M scores  $\geq 45$  (OR 3.34, 95% CI 1.54-7.27,  $p < 0.01$ ). Higher PCL-M scores were also associated with  
50 older age, male sex, and Māori ethnicity (New Zealand's indigenous population). Factors associated  
51 with lower PCL-M scores were greater length of service, psychological flexibility, and better quality  
52 sleep.

53 Conclusions: PTS was found to be prevalent among New Zealand military personnel. The experience  
54 of trauma was strongly associated with PTS. However, factors such as psychological flexibility (the  
55 ability to adapt to changes in circumstances) and good sleep were protective, suggesting that these  
56 factors could be key targets for interventions designed to reduce PTS among military personnel in New  
57 Zealand.

## 58 **Key words**

59 Military Personnel, Post-Traumatic Stress (PTS), Psychological Flexibility, Sleep, Trauma

## 60 Introduction

61 In New Zealand, the Defence Force has three primary personnel groups: the Regular Force, Reserve  
62 Forces, and Civilians (including those employed by the Defence Force and working overseas) (1). These  
63 military personnel are responsible for contributing to the defence, security and wellbeing of the  
64 country. Research from other countries suggests that while many military personnel cope well with  
65 their roles (2) , they are exposed to higher rates of both military and non-military trauma compared  
66 to the general population (3-5) , and are at greater risk of experiencing post-traumatic stress (PTS) (6).  
67 An elevated risk has been identified among military personnel even during periods of low deployment  
68 activity (7-9).

69 Two critical events are commonly described in the military 'life course' – achievement of veteran  
70 status through operational deployment, and transition from military to civilian life. Operational  
71 deployment and witnessing atrocities has been associated with PTS (10, 11), while the period of  
72 transition from the military to civilian life has been found to confer an elevated risk of suicide,  
73 regardless of deployment history (12). A lack of support during this period (including social and family  
74 support) serves to amplify suicide risk, and has been found to contribute to the experience of PTS (13).

75 While the critical events described above have been identified across diverse military samples (13),  
76 estimates of the prevalence of PTS vary dramatically both across and within countries. For example,  
77 the prevalence of PTS identified within the United Kingdom Armed Forces is significantly lower than  
78 that reported for military personnel serving in the United States, Australia, and Canada (14). Although  
79 differences are partially attributable to variation in sampling strategies, research methods, and  
80 diagnostic thresholds, differences in exposure to risk factors are also likely to play a role (14). Research  
81 in veteran populations suggests that factors that can negatively affect adaptation to deployment and  
82 civilian transition include: female gender, ethnicity, high number of and longer duration deployments,  
83 prior adverse life events, pre-existing psychological disorders, trauma exposure, and alcohol misuse  
84 (13, 15-18). Conversely, sleep (19, 20), social support (21), and psychological flexibility (the ability to

85 fully experience thoughts and feelings and flexibly choose behaviour that is in line with personal goals  
86 and values) (22) have potential to protect against poor mental health outcomes, including PTS.

87 A significant number of New Zealand military personnel have been exposed to high levels of combat-  
88 related trauma and others have been deployed on peace-keeping missions (23). Moral injury is one  
89 stressor associated with peace-keeping missions, defined as “perpetrating, failing to prevent, bearing  
90 witness to, or learning about acts that transgress deeply held moral beliefs and expectations” (24).  
91 Other stressors include the restrictive rules of engagement (25), monotony and boredom, personnel  
92 encounter difficulties, and separation from family (26). Pre-deployment and follow-up stages are also  
93 important to consider; these were the most stressful periods, and had the greatest effect on mental  
94 and physical health, in a longitudinal study of 277 New Zealand military personnel deployed on  
95 peacekeeping duties (23).

96 While 10% of a community sample of New Zealand Vietnam War veterans were found to experience  
97 PTS (27), the prevalence of PTS among New Zealand military personnel more generally has not  
98 previously been reported. One reason for this is lower response rates to post-deployment screens for  
99 PTS (28). Research is also yet to identify the key harmful and protective factors associated with PTS in  
100 this population. This information is important to detect individuals who would benefit from targeted  
101 support following transition from the military, in order to reduce their risk of experiencing PTS. The  
102 aims of this cross-sectional study were to: 1) determine the prevalence of PTS (symptomology and  
103 presumptive cases), and 2) identify protective and harmful factors most strongly associated with PTS  
104 in New Zealand military personnel.

## 105 **Materials and Methods**

### 106 **Sample**

107 An online or paper questionnaire was available during June to December 2018 for completion by all  
108 currently serving and retired military personnel living in New Zealand. We attempted to minimise bias  
109 through an intensive recruitment campaign. In mid-June, a link to the online questionnaire was sent  
110 by email to all currently serving regular and reserve New Zealand Defence Force (NZDF) members who

111 were holders of the New Zealand Operational Service Medal (NZOSM), numbering 3874 individuals at  
112 that time. A global message and a link to the questionnaire was also presented on the NZDF 'intranet  
113 landing page', the webpage from which all currently serving personnel can access relevant work-  
114 related content, tools, and resources. Retired military personnel were recruited through paper  
115 questionnaires and posters distributed to the 43 local social clubs of the Royal New Zealand Returned  
116 and Services Association (RSA) identified by the RSA national office to be 'veteran active.'  
117 Announcements were also made on military social media pages, and both retired and currently serving  
118 personnel were invited to participate through an announcement on the No Duff Charitable Trust  
119 website; No Duff is a registered charity committed to providing confidential support for military  
120 personnel and their families in New Zealand (29).

## 121 Procedure

122 Military personnel interested in taking part in the study were directed to visit a website where they  
123 were required to enter their name and email address. This resulted in a personalised link being sent  
124 to their email address from which they could complete an online secure version of the questionnaire.  
125 All serving military personnel were informed that they could request a paper version of the survey if  
126 this was their personal preference. The study received approval from the Southern Health and  
127 Disability Ethics Committee of New Zealand (15/STH/40/AM02). We consulted with the Ngāi Tahu  
128 Research Consultation Committee in order to assess the importance of the project to Māori, New  
129 Zealand's indigenous population. For 6 predictor variables in a multivariate model, we needed at least  
130 600 cases.

## 131 Measures

132 The questionnaire included standardised measures of PTS (outcome), and potentially harmful and  
133 protective exposures. Potentially adverse exposures examined included trauma, general distress, and  
134 hazardous drinking. Protective exposures included social support, sleep, and psychological flexibility.  
135 Symptoms of PTS were assessed using the post-traumatic stress disorder (PTSD) checklist – military  
136 version (PCL-M). The PCL-M includes 17 items that ask about symptoms related to stressful military

137 experiences, with response options ranging from 1 'Not at all' to 5 'Extremely' (30). A total symptom  
138 severity score is calculated by summing responses to each option. While scores of 30-35 indicate  
139 significant PTS symptomology and probable cases of PTSD, scores of  $\geq 45$  indicate a presumptive PTSD  
140 diagnosis (30). The PCL-M has been identified as a widely used and well-validated measure (31).

141 The Brief Trauma Questionnaire (BTQ) was used to assess exposure to trauma. The BTQ consists of 10  
142 items that screen for a range of different traumatic experiences [31]. Exposure to an event is scored  
143 as positive if a respondent says 'yes' to indicate life threat or serious injury from combat trauma, a  
144 serious car accident, a natural disaster, life-threatening illness, and physical or sexual abuse, or to  
145 indicate exposure to violent death (32). The BTQ is considered a reliable and valid measure to assess  
146 trauma exposure in defence force personnel (33).

147 Symptoms of distress were screened for using the General Health Questionnaire 12 (GHQ-12). This  
148 measure includes 12 items with a four-point response scale (34). Items are summed to yield an overall  
149 total score, with higher scores indicating greater distress (34).

150 The AUDIT-C is a 3-item measure that was used to identify potentially hazardous drinking (35). Each  
151 item is answered using five response options, with possible total scores ranging from 0 to 12 (35). A  
152 total score of  $\geq 3$  for women, and  $\geq 4$  for men, was used to identify participants engaging in hazardous  
153 drinking. The AUDIT-C has been validated in veteran populations (36, 37).

154 The Social Provisions Scale (SPS) was used to examine participant perceptions of the availability of  
155 different dimensions of social support. This theory-based social support instrument includes 24 items  
156 distributed across six subscales: reliable alliance, attachment, nurturance, social integration,  
157 reassurance of worth, and guidance (38). Each item is rated on a 4-point Likert scale with responses  
158 ranging from 'strongly disagree' to 'strongly agree' (38). After reversal of negatively worded items a  
159 total score was computed by summing all items. Higher scores (including total scores and individual  
160 subscale scores) indicate higher levels of perceived social support. The construct validity, internal

161 consistency, and test-retest reliability of the measure has been established across diverse populations  
162 (38, 39).

163 To screen for insomnia disorder based on DSM-5 criteria we used the 8-item Sleep Condition Indicator  
164 (SCI) (40). All items were scored on a four point scale (0 to 4), with possible summed scores on this  
165 measure range from 0 to 32; scores were then re-scaled to a 0 to 10 scale (40). Higher scores are  
166 indicative of better sleep.

167 To evaluate psychological flexibility, the 10-item Acceptance and Action Questionnaire II (AAQ-II) was  
168 used (41). After reversing negatively worded items, the items of the scale were summed to obtain a  
169 total score (possible range 10 to 70), with higher scores indicative of greater psychological flexibility  
170 (less experiential avoidance) (41).

171 The questionnaire also included a series of sociodemographic questions (gender, ethnicity, marital  
172 status, education level, employment status) and questions about service history, rank, and  
173 deployments.

## 174 **Analyses**

175 Statistical analyses were completed using Stata 15 software (42). First, descriptive statistics were used  
176 to describe the demographic characteristics of participants. Next, exploratory analyses investigated  
177 univariate associations between demographic, hazardous and protective factors, and the PTS  
178 outcomes (PCL-M  $\geq 30$  and PCL-M  $\geq 45$ ), with odds ratios (ORs) and 95% confidence intervals (CIs)  
179 estimated using logistic regression. Following this, multivariable logistic regression (adjusted for age,  
180 sex, service years, and deployment status) was performed to identify exposures associated with PTS  
181 **using a backward elimination process**; variables with a  $p$ -value  $> 0.10$  were sequentially dropped from  
182 the model. Missing data was addressed using developer recommendations or previous approaches  
183 for each measure. For example, in instances where one item was missing from the PCL-M the mean  
184 score was imputed; if more than one item was missing on the PCL-M the case was excluded from  
185 analyses (43). **Only participants with complete data were included in the multivariable analyses.**

186 **Results**

187 A total of 1817 military personnel completed the questionnaire; 90 of the participants completed a  
188 paper version. Among participants, 549 (30%) reported PCL-M scores of  $\geq 30$  indicating significant PTS  
189 symptomology (probable PTSD), and 179 (10%) reported PCL-M scores of  $\geq 45$ , indicative of  
190 presumptive clinical PTS.

191 The demographic characteristics of participants categorised according to the experience of probable  
192 PTS (scores  $\geq 30$ ) are presented in Table 1.

193

194 **Table 1.** Demographic characteristics of participants according to PCL-M scores.

| <b>Characteristic</b> | <b>Low PCL-M Score<br/>17-29 (n = 1268)</b> | <b>High PCL-M Score<br/>≥30 (n = 549)</b> |
|-----------------------|---------------------------------------------|-------------------------------------------|
| <i>Age (years)</i>    |                                             |                                           |
| 20-29                 | 124 (84%)                                   | 24 (16%)                                  |
| 30-39                 | 264 (75%)                                   | 86 (25%)                                  |
| 40-49                 | 327 (71%)                                   | 134 (29%)                                 |
| 50-59                 | 247 (69%)                                   | 111 (31%)                                 |
| 60-69                 | 176 (63%)                                   | 103 (37%)                                 |
| 70+                   | 127 (59%)                                   | 89 (41%)                                  |
| missing               | 3 (60%)                                     | 2 (40%)                                   |
| <i>Sex</i>            |                                             |                                           |
| Female                | 183 (77%)                                   | 54 (23%)                                  |
| Male                  | 1065 (69%)                                  | 488 (31%)                                 |
| missing               | 20 (74%)                                    | 7 (26%)                                   |
| <i>Ethnicity</i>      |                                             |                                           |
| NZ European           | 997 (70%)                                   | 418 (30%)                                 |
| Māori                 | 177 (69%)                                   | 79 (31%)                                  |
| Other                 | 94 (64%)                                    | 52 (36%)                                  |
| <i>Service Years</i>  |                                             |                                           |
| 0-9                   | 213 (62%)                                   | 132 (38%)                                 |
| 10-19                 | 350 (70%)                                   | 153 (30%)                                 |
| 20-29                 | 390 (73%)                                   | 144 (27%)                                 |
| 30-39                 | 181 (69%)                                   | 80 (31%)                                  |
| 40-49                 | 43 (65%)                                    | 23 (35%)                                  |
| missing               | 91 (84%)                                    | 17 (16%)                                  |
| <i>Deployed</i>       |                                             |                                           |
| No                    | 186 (67%)                                   | 92 (33%)                                  |
| Yes                   | 1012 (71%)                                  | 415 (29%)                                 |
| missing               | 70 (63%)                                    | 42 (37%)                                  |

195  
 196 The median age of participants was 49.1 years (interquartile range = 38.7 – 61.1 years). The majority  
 197 were male (87%) and were of New Zealand European ethnicity (78%); 14% of participants identified  
 198 as Māori, similar to that of the NZDF as a whole, reported as 15%. Most participants had served in the  
 199 military for at least 10 years (80%) and had been deployed at least once (84%).

200 Descriptive statistics for exposures (harmful and protective factors) treated as continuous variables in  
 201 the analyses are presented in Table 2.

202



203 **Table 2.** Descriptive statistics for continuous variables used in logistic regression analyses.

| Exposure                                              | Mean | Standard Deviation | Median | Inter-quartile Range |
|-------------------------------------------------------|------|--------------------|--------|----------------------|
| Distress (GHQ-12)<br><i>n</i> = 1735                  | 11.9 | 5.1                | 11     | 8 – 14               |
| Social Support (SPS)<br><i>n</i> = 1778               | 75.8 | 10.8               | 75     | 40 – 96              |
| Psychological Flexibility (AAQ-II)<br><i>n</i> = 1734 | 52.3 | 10.1               | 54     | 46 – 60              |
| Sleep (SCI)<br><i>n</i> = 1711                        | 5.9  | 2.2                | 5.6    | 4.4 – 7.8            |

204  
 205 Of the 1656 participants who completed the AUDIT-C, 898 (54%) reported hazardous drinking. Of the  
 206 1715 participants who completed the BTQ, the majority (*n* = 1187, 69%) had been exposed to trauma.  
 207 1006 (59%) had served in a war zone and 736 (73%) of these individuals reported that this presented  
 208 a threat to life and/or a threat of serious injury. The proportion of participants experiencing other  
 209 traumatic events, including childhood physical and sexual abuse, was also high (35% and 16%  
 210 respectively).

## 211 **Univariate Analyses**

212 Results of univariate analyses describing associations between exposure variables (demographic, risk,  
 213 and protective factors) and PTS are presented in Table 3, showing both the odds of experiencing  
 214 symptoms of PTS (PCL-M scores  $\geq 30$ ) and the odds of experiencing clinically relevant PTS (scores  $\geq 45$ ).  
 215 With respect to PTS symptomology, older age, male sex, higher distress, and exposure to trauma were  
 216 significantly associated with increased likelihood of PTS symptoms. In contrast, increased number of  
 217 years in service, social support, psychological flexibility, and sleep were significantly associated with  
 218 lower odds of experiencing PTS symptoms. The same pattern of associations was also found for  
 219 clinically relevant PTS, in addition to greater odds of clinical PTS among individuals identifying as Māori  
 220 compared to those of NZ European ethnicity.

221 **Table 3.** Univariate associations between exposure variables and elevated PCL-M scores ( $\geq 30$  and  $\geq 45$  respectively).

| Characteristic                    | PCL-M Score $\geq 30$ |               |          |          | PCL-M Score $\geq 45$ |               |          |          |
|-----------------------------------|-----------------------|---------------|----------|----------|-----------------------|---------------|----------|----------|
|                                   | OR                    | 95% CI for OR | <i>p</i> | <i>n</i> | OR                    | 95% CI for OR | <i>p</i> | <i>n</i> |
| <i>Age (Years)*</i>               | 1.02                  | 1.01, 1.03    | <0.01    | 1812     | 1.03                  | 1.02, 1.05    | <0.01    | 1812     |
| <i>Sex</i>                        |                       |               |          |          |                       |               |          |          |
| Female                            | Ref                   |               |          |          | Ref                   |               |          |          |
| Male                              | 1.55                  | 1.13, 2.14    | 0.01     | 1790     | 2.03                  | 1.14, 3.64    | 0.02     | 1790     |
| <i>Ethnicity</i>                  |                       |               |          |          |                       |               |          |          |
| NZ European                       | Ref                   |               |          |          | Ref                   |               |          |          |
| Māori                             | 1.06                  | 0.80, 1.42    | 0.67     |          | 1.78                  | 1.21, 2.63    | <0.01    |          |
| Other                             | 1.32                  | 0.92, 1.89    | 0.13     | 1817     | 1.17                  | 0.67, 2.06    | 0.58     | 1817     |
| <i>Service Years*</i>             | 0.99                  | 0.98, 1.00    | 0.03     | 1709     | 0.97                  | 0.96, 0.99    | <0.01    | 1709     |
| <i>Deployed</i>                   |                       |               |          |          |                       |               |          |          |
| No                                | Ref                   |               |          |          | Ref                   |               |          |          |
| Yes                               | 0.83                  | 0.63, 1.10    | 0.18     | 1705     | 0.76                  | 0.50, 1.13    | 0.18     | 1705     |
| <i>Distress*</i>                  | 1.27                  | 1.23, 1.30    | <0.01    | 1735     | 1.21                  | 1.18, 1.25    | <0.01    | 1735     |
| <i>Social Support*</i>            | 0.91                  | 0.90, 0.93    | <0.01    | 1778     | 0.91                  | 0.90, 0.93    | <0.01    | 1778     |
| <i>Psychological Flexibility*</i> | 0.84                  | 0.82, 0.85    | <0.01    | 1734     | 0.84                  | 0.82, 0.86    | <0.01    | 1734     |
| <i>Sleep*</i>                     | 0.53                  | 0.49, 0.57    | <0.01    | 1711     | 0.41                  | 0.36, 0.46    | <0.01    | 1711     |
| <i>Hazardous Drinking</i>         |                       |               |          |          |                       |               |          |          |
| No                                | Ref                   |               |          |          | Ref                   |               |          |          |
| Yes                               | 1.06                  | 0.86, 1.31    | 0.58     | 1656     | 0.81                  | 0.58, 1.12    | 0.20     | 1656     |
| <i>Trauma Exposure</i>            |                       |               |          |          |                       |               |          |          |
| No                                | Ref                   |               |          |          | Ref                   |               |          |          |
| Yes                               | 4.04                  | 3.05, 5.35    | <0.01    | 1715     | 7.11                  | 3.82, 13.23   | <0.01    | 1715     |

222 Note. \*Continuous variable (no reference group).

## 223 **Multivariate Analyses**

224 Results of multivariate analyses describing associations between exposure variables and PTS, after  
225 adjustment for age, sex, service years and deployment status, are presented in Table 4, including for  
226 odds of experiencing PTS symptomology (PCL-M scores  $\geq 30$ ) and for odds of clinically relevant PTS  
227 (scores  $\geq 45$ ). With respect to PTS symptomology, older age, male sex, higher distress, and exposure  
228 to trauma were significantly associated with an increased likelihood of PTS. Increased number of years  
229 in service, psychological flexibility, and sleep were significantly associated with decreased odds of  
230 experiencing PTS symptoms; social support was no longer significantly associated with this outcome.  
231 A single unit increase in sleep score corresponded to a 30% reduction in odds of experiencing  
232 significant PTS symptoms. The same pattern of results was found for clinically-relevant PTS, with the  
233 exception of higher distress, which was not significantly associated. In addition, Māori participants  
234 were found to have greater odds of experiencing clinically relevant PTS when compared to New  
235 Zealand Europeans.

236 **Table 4.** Multivariate associations between exposure variables and elevated PTSD (scores  $\geq 30$  and scores  $\geq 45$ ).

| Characteristic                    | PCL-M Score $\geq 30$ , n = 1532 |               |          | PCL-M Score $\geq 45$ , n = 1567 |               |          |
|-----------------------------------|----------------------------------|---------------|----------|----------------------------------|---------------|----------|
|                                   | OR                               | 95% CI for OR | <i>p</i> | OR                               | 95% CI for OR | <i>p</i> |
| <i>Age (Years)*</i>               | 1.02                             | 1.01, 1.03    | <0.01    | 1.04                             | 1.03, 1.06    | <0.01    |
| <i>Sex</i>                        |                                  |               |          |                                  |               |          |
| Female                            | Ref                              |               |          | Ref                              |               |          |
| Male                              | 1.84                             | 1.14, 2.98    | 0.01     | 1.69                             | 0.74, 3.86    | 0.21     |
| <i>Ethnicity</i>                  |                                  |               |          |                                  |               |          |
| NZ European                       |                                  |               |          | Ref                              |               |          |
| Māori                             |                                  |               |          | 2.80                             | 1.54, 5.10    | <0.01    |
| Other                             |                                  |               |          | 0.97                             | 0.40, 2.31    | 0.94     |
| <i>Service Years*</i>             | 0.98                             | 0.97, 1.00    | 0.01     | 0.97                             | 0.95, 0.99    | <0.01    |
| <i>Deployed</i>                   |                                  |               |          |                                  |               |          |
| No                                | Ref                              |               |          | Ref                              |               |          |
| Yes                               | 1.31                             | 0.85, 2.00    | 0.22     | 1.54                             | 0.84, 2.81    | 0.16     |
| <i>Distress*</i>                  | 1.07                             | 1.03, 1.11    | <0.01    |                                  |               |          |
| <i>Psychological Flexibility*</i> | 0.87                             | 0.85, 0.89    | <0.01    | 0.87                             | 0.85, 0.90    | <0.01    |
| <i>Sleep*</i>                     | 0.70                             | 0.64, 0.77    | <0.01    | 0.56                             | 0.49, 0.66    | <0.01    |
| <i>Hazardous Drinking</i>         |                                  |               |          |                                  |               |          |
| No                                | Ref                              |               |          |                                  |               |          |
| Yes                               | 1.11                             | 0.96, 1.77    | 0.08     |                                  |               |          |
| <i>Trauma Exposure</i>            |                                  |               |          |                                  |               |          |
| No                                | Ref                              |               |          | Ref                              |               |          |
| Yes                               | 3.03                             | 2.07, 4.41    | <0.01    | 3.34                             | 1.54, 7.27    | <0.01    |

237 Note. Variables with a *p*-value less than 0.10 after adjustment for age, sex, service years, and deployment status are included in the model. \*Continuous  
 238 variable (no reference group).

## Discussion

239 This cross-sectional study identified a high prevalence of PTS in a large sample of currently serving and  
240 retired New Zealand military personnel. Thirty percent of participants reported experiencing probable  
241 PTS and 10% were identified as having clinically relevant PTS. These findings are similar to those  
242 reported in an earlier study, which found evidence of PTS among 10% of New Zealand Vietnam war  
243 veterans (27), indicating that it is not only retired veterans who are at risk. Our results highlight that  
244 support to deal with PTS is needed for a large number of New Zealanders who are serving, or have  
245 served, in the military.

247 Strengths of this study include the large sample, and the inclusion of those who have never been  
248 deployed. Our study also serves to provide a snapshot of New Zealand military personnel, for which  
249 the total number of those who have served and who are currently serving is unknown. Although the  
250 number of individuals in the sample who had never been deployed was small, our findings suggest  
251 that these individuals are also at risk of PTS. Evidence that personnel who have never deployed are at  
252 greater risk of PTS than the general population is growing (9, 44). It is clear that factors other than  
253 deployment have an important role to play in the experience of PTS among military personnel.

254 At the time the questionnaire was distributed there were 4822 serving veterans in the NZDF, 1038 of  
255 whom were reservists and unlikely to receive the email invitation. As the majority of questionnaires  
256 were completed by currently serving personnel, the response rate would have been in the order of  
257 30%. This gives rise to potential sampling bias. Military personnel with higher PTS may have been more  
258 likely to participate, giving rise to inflated estimates of PTS prevalence. Conversely, our findings may  
259 underestimate the prevalence of PTS in this population if those without PTS were more inclined to  
260 participate. Another limitation of the study is the cross-sectional design which precludes the  
261 identification of cause and effect relationships between exposures and PTS. Additionally, although we  
262 assessed and accounted for a range of known confounders, it is still possible some important

263 confounders were not assessed in the survey and may explain significant relationships between  
264 exposures and PTS.

265 It is unclear how generalisable the study findings are to countries outside of New Zealand, where the  
266 characteristics of military personnel, deployment experiences, and post-deployment support services  
267 are likely to differ (14). Nevertheless, health support for military personnel in New Zealand follows  
268 that provided by American, Canadian, British, and Australian Defence Forces. Scores on the PCL-M  
269 measure reported by our participants suggest that as many as 10% may have symptoms likely to result  
270 in a clinical diagnosis of PTSD. This is in line with point prevalence estimates of combat-related PTSD  
271 in US military veterans, ranging from approximately 2% to 17% (6). Summary estimates of PTSD  
272 prevalence for military personnel and veterans from a number of countries range from 1.1% to 34.8%  
273 (13). The prevalence of PTS identified in our study is higher than that documented among UK military  
274 personnel, although this **may be attributable to variation in sampling strategies and measures used**  
275 (45). Differences in PTS estimates may also be due to variation in socio-political and cultural factors  
276 that vary across nations (6).

277 Trauma exposure was most strongly associated with odds of experiencing PTS symptomology and  
278 clinically relevant PTS in the present study, and is a prerequisite for a DSM IV diagnosis of PTSD.  
279 General distress was significantly associated with increased odds of PTS symptoms, although was not  
280 significantly associated with odds of clinical PTS after adjustment for age, sex, service years, and  
281 deployment status. This is consistent with findings from a meta-analysis of risk factors for combat-  
282 related PTS among military personnel and veterans, which did not identify general distress to be a  
283 significant risk factor, although a history of prior psychological problems and trauma exposure were  
284 (13).

285 Māori participants had greater odds of reporting clinical PTS than their New Zealand European  
286 counterparts. Higher levels of PTS among Māori were also detected in a sample of 756 New Zealand  
287 Vietnam War veterans, however, the effect of ethnicity on PTS was mediated by higher levels of

288 combat stressors experienced by Māori, including stressors related to combat exposure, rank, and  
289 combat role (46).

290 Consistent with findings of a study examining predictors of persistent PTS in UK military personnel  
291 (47), older age was significantly associated with increased odds of experiencing PTS. However, in  
292 contrast to other studies examining PTS in military personnel, males were at greater risk of  
293 experiencing PTS than females. It is important to note that other studies identifying females to be at  
294 greater risk of PTS have focused on combat-related PTS (13), and our sample includes personnel who  
295 never deployed.

296 Despite older age being associated with increased odds of PTS, a greater number of service years was  
297 associated with reduced odds of PTS. This may reflect a resilience that develops over time among long-  
298 serving personnel, or may be due to individuals with PTS leaving military service earlier as has been  
299 reported among UK Armed Forces Personnel (48). Sleep was also found to be protective against PTS.  
300 Self-reported sleep problems have consistently been associated with the experience of PTS in veteran  
301 populations (49). Early intervention among military personnel experiencing sleep disturbance may  
302 help to reduce PTS symptoms. An investigation of 44 military personnel who received cognitive  
303 behavioural therapy for insomnia found that participants who experienced improved sleep quality  
304 from pre- to post-treatment (n=28) had significant declines in depression and PTS symptoms (20). In  
305 contrast, those whose sleep did not improve had no changes in their psychiatric symptoms, as well as  
306 a reduction in health-related quality of life.

307 In the present study, psychological flexibility was associated with reduced odds of reporting PTS.  
308 However, it is important to interpret our findings with caution as there have been criticisms of the  
309 AAQ-II, with several researchers arguing that it may be measuring psychological distress rather than  
310 psychological inflexibility (50). Furthermore, numerous versions of the AAQ-II exist which can make it  
311 difficult to compare findings across studies. Despite few studies examining psychological flexibility  
312 among military personnel, techniques designed to increase psychological flexibility (such as

313 acceptance and commitment therapy) are being investigated as potential treatments for PTS in this  
314 population (51-53), and evidence for their effectiveness is emerging (54).

## 315 **Conclusions**

316 Knowledge of the harmful and protective factors associated with PTS may allow for early identification  
317 of military personnel who would benefit from targeted support to promote their wellbeing. Our  
318 findings suggest that **traumatic exposure** is most strongly associated with high levels of PTS, while  
319 good sleep and psychological flexibility are protective. As these protective factors are amenable to  
320 standardised measurement and modification, early detection could facilitate intervention. Future  
321 research is needed to identify whether relationships can be found longitudinally, which would provide  
322 further evidence regarding New Zealand military personnel most at risk of experiencing PTS.

## 323 **Acknowledgements**

324 The authors would like to thank all New Zealand military personnel who participated in this study.  
325 The study was funded by the Veterans Medical Research Trust Fund, Lottery Health and the Royal New  
326 Zealand Returned and Services Association.

## 327 **References**

- 328 1. New Zealand Defence Force. Personnel Summary: New Zealand Government; 2019. Available from:  
329 <http://www.nzdf.mil.nz/personnel-records/personnel-branch/>.
- 330 2. Hunt EJJ, Wessely S, Jones N, Rona RJ, Greenberg N. The mental health of the UK Armed Forces:  
331 where facts meet fiction. *Eur J Psychotraumatol*. 2014;5(1): 23617.
- 332 3. Stretch RH, Knudson KH, Durand D. Effects of premilitary and military trauma on the development  
333 of post-traumatic stress disorder symptoms in female and male active duty soldiers. *Mil Med*.  
334 1998;163(7): 466-470.
- 335 4. Durand D, Knudson KH, Stretch RH. Psychological Health and Trauma in Male and Female Soldiers.  
336 *Mil Med*. 1998;163(6): 363-367.



- 337 5. Afifi TO, Taillieu T, Zamorski MA, Turner S, Cheung K, Sareen J. Association of child abuse exposure  
338 with suicidal ideation, suicide plans, and suicide attempts in military personnel and the general  
339 population in Canada. *JAMA Psychiatry*. 2016;73(3): 229-238.
- 340 6. Richardson LK, Frueh BC, Acierno R. Prevalence estimates of combat-related post-traumatic stress  
341 disorder: critical review. *Aust N Z J Psychiatry*. 2010;44(1): 4-19.
- 342 7. Roux CI, Stein DJ, Seedat S. Prevalence and characteristics of trauma and post-traumatic stress  
343 symptoms in operational members of the South African National Defence Force. *Mil Med*.  
344 2003;168(1): 71-75.
- 345 8. Jones M, Rona RJ, Hooper R, Wessely S. The burden of psychological symptoms in UK Armed  
346 Forces. *Occup Med*. 2006;56(5): 322-328.
- 347 9. McKenzie DP, Ikin JF, McFarlane AC, Creamer M, Forbes AB, Kelsall HL, et al. Psychological health of  
348 Australian veterans of the 1991 Gulf War: an assessment using the SF-12, GHQ-12 and PCL-S. *Psychol*  
349 *Med*. 2004;34(8): 1419-1430.
- 350 10. Jones M, Sundin J, Goodwin L, Hull L, Fear NT, Wessely S, et al. What explains post-traumatic stress  
351 disorder (PTSD) in UK service personnel: deployment or something else? *Psychol Med*. 2012;43(8):  
352 1703-1712.
- 353 11. Sareen J, Cox BJ, Afifi TO, Stein MB, Belik S-L, Meadows G, et al. Combat and peacekeeping  
354 operations in relation to prevalence of mental disorders and perceived need for mental health care:  
355 findings from a large representative sample of military personnel. *JAMA Psychiatry*. 2007;64(7): 843-  
356 852.
- 357 12. Pease JL, Billera M, Gerard G. Military culture and the transition to civilian life: suicide risk and  
358 other considerations. *Social Work*. 2015;61(1): 83-86.
- 359 13. Xue C, Ge Y, Tang B, Liu Y, Kang P, Wang M, et al. A Meta-Analysis of Risk Factors for Combat-  
360 Related PTSD among Military Personnel and Veterans. *PLoS One*. 2015;10(3): e0120270.

- 361 14. Yehuda R, Vermetten E, McFarlane AC, Lehrner A. PTSD in the military: special considerations for  
362 understanding prevalence, pathophysiology and treatment following deployment. *Eur J*  
363 *Psychotraumatol.* 2014;5(1): 25322.
- 364 15. Koenen KC, Stellman SD, Dohrenwend BP, Sommer Jr. JF, Stellman JM. The consistency of combat  
365 exposure reporting and course of PTSD in Vietnam War veterans. *J Trauma Stress.* 2007;20(1): 3-13.
- 366 16. Reger MA, Gahm GA, Swanson RD, Duma SJ. Association between number of deployments to Iraq  
367 and mental health screening outcomes in US Army soldiers. *J Clin Psychiatry.* 2009;70(9): 1266-1272.
- 368 17. Jakupcak M, Tull MT, McDermott MJ, Kaysen D, Hunt S, Simpson T. PTSD symptom clusters in  
369 relationship to alcohol misuse among Iraq and Afghanistan war veterans seeking post-deployment VA  
370 health care. *Addict Behav.* 2010;35(9): 840-843.
- 371 18. Iversen A, Waterdrinker A, Fear N, Greenberg N, Barker C, Hotopf M, et al. Factors associated with  
372 heavy alcohol consumption in the U.K. Armed Forces: data from a health survey of Gulf, Bosnia, and  
373 era Veterans. *Mil Med.* 2007;172(9): 956-961.
- 374 19. Wright KM, Britt TW, Bliese PD, Adler AB, Picchioni D, Moore D. Insomnia as predictor versus  
375 outcome of PTSD and depression among Iraq combat veterans. *J Clin Psychol.* 2011;67(12): 1240-1258.
- 376 20. Rusch HL, Guardado P, Baxter T, Mysliwiec V, Gill JM. Improved sleep quality is associated with  
377 reductions in depression and PTSD arousal symptoms and increases in IGF-1 concentrations. *J Clin*  
378 *Sleep Med.* 2015;11(6): 615-623.
- 379 21. Pietrzak RH, Johnson DC, Goldstein MB, Malley JC, Southwick SM. Psychological resilience and  
380 postdeployment social support protect against traumatic stress and depressive symptoms in soldiers  
381 returning from Operations Enduring Freedom and Iraqi Freedom. *Depress Anxiety.* 2009;26(8): 745-  
382 751.
- 383 22. Dutra SJ, Sadeh N. Psychological flexibility mitigates effects of PTSD symptoms and negative  
384 urgency on aggressive behavior in trauma-exposed veterans. *Personality Disord.* 2018;9(4): 315-23.

- 385 23. Chamberlain K, MacDonald C, Pereira-Laird J, Long N, Mirfin K. Mental health, physical health, and  
386 stressors reported by New Zealand Defence Force peacekeepers: a longitudinal study. *Mil Med.*  
387 1998;163(7): 477-481.
- 388 24. Litz BT, Stein N, Delaney E, Lebowitz L, Nash WP, Silva C, et al. Moral injury and moral repair in war  
389 veterans: A preliminary model and intervention strategy. *Clin Psychol Rev.* 2009;29(8): 695-706.
- 390 25. Litz BT, Orsillo SM, Friedman M, Ehlich P, et al. Posttraumatic stress disorder associated with  
391 peacekeeping duty in Somalia for U.S. military personnel. *Am J Psychiatry.* 1997;154(2): 178-184.
- 392 26. Ritchie EC, Ruck DC, Anderson MW. The 528th combat stress control unit in Somalia in support of  
393 operation restore hope. *Mil Med.* 1994;159(5): 372-376.
- 394 27. Long N, MacDonald C, Chamberlain K. Prevalence of posttraumatic stress disorder, depression and  
395 anxiety in a community sample of New Zealand Vietnam War veterans. *Aust N Z J Psychiatry.*  
396 1996;30(2): 253-256.
- 397 28. Brounéus K, Wray M, Green P. Underestimating the burden for peacekeepers? Difficulty in  
398 determining psychological well-being following operational deployment with low response rates from  
399 NZDF personnel. *J Mil Veterans Health.* 2015;23(2): 7-13.
- 400 29. No Duff Charitable Trust. No Duff - Confidential help for veterans their families. 2019. Available  
401 from: <https://www.noduff.org/>.
- 402 30. U.S. Department of Veterans Affairs. Using the PTSD Checklist (PCL). Veterans Affairs National  
403 Center for PTSD; 2012.
- 404 31. Wilkins KC, Lang AJ, Norman SB. Synthesis of the psychometric properties of the PTSD checklist  
405 (PCL) military, civilian, and specific versions. *Depress Anxiety.* 2011;28(7): 596-606.
- 406 32. Schnurr PP, Spiro A, Vielhauer MJ, Findler MN, Hamblen JL. Trauma in the lives of older men:  
407 findings from the normative aging study. *J Clin Geropsychol.* 2002;8(3): 175-187.
- 408 33. Whealin JM, Batzer WB, Morgan CA, III, Detwiler HF, Jr., Schnurr PP, Friedman MJ. Cohesion,  
409 burnout, and past trauma in tri-service medical and support personnel. *Mil Med.* 2007;172(3): 266-  
410 272.

411 34. Goldberg D, Williams P. A user's guide to the General Health Questionnaire. Windsor, United  
412 Kingdom: NFER-Nelson; 1988.

413 35. Bush K, Kivlahan DR, McDonell MB, Fihn SD, Bradley KA. The AUDIT alcohol consumption questions  
414 (AUDIT-C): an effective brief screening test for problem drinking. *JAMA Intern Med.* 1998;158(16):  
415 1789-1795.

416 36. Crawford EF, Fulton JJ, Swinkels CM, Beckham JC, Calhoun PS. Diagnostic efficiency of the AUDIT-  
417 C in U.S. veterans with military service since September 11, 2001. *Drug Alcohol Depend.* 2013;132(1):  
418 101-106.

419 37. Bradley KA, Bush KR, Epler AJ, Dobie DJ, Davis TM, Sporleder JL, et al. Two brief alcohol-screening  
420 tests from the Alcohol Use Disorders Identification Test (AUDIT): validation in a female Veterans Affairs  
421 patient population. *JAMA Intern Med.* 2003;163(7): 821-829.

422 38. Cutrona CE, Russell DW. The provisions of social relationships and adaptation to stress. *Adv Pers*  
423 *Rel.* 1987;1: 37-67.

424 39. Mancini JA, Blieszner R. Social provisions in adulthood: concept and measurement in close  
425 relationships. *J Gerontol.* 1992;47(1): P14-P20.

426 40. Espie CA, Kyle SD, Hames P, Gardani M, Fleming L, Cape J. The Sleep Condition Indicator: a clinical  
427 screening tool to evaluate insomnia disorder. *BMJ Open.* 2014;4(3): e004183.

428 41. Bond FW, Hayes SC, Baer RA, Carpenter KM, Guenole N, Orcutt HK, et al. Preliminary psychometric  
429 properties of the Acceptance and Action Questionnaire-II: a revised measure of psychological  
430 inflexibility and experiential avoidance. *Behav Therapy.* 2011;42(4): 676-688.

431 42. StataCorp. *Stata Statistical Software: Release 15.* College Station, TX: StataCorp LLC; 2017.

432 43. Iwasa H, Suzuki Y, Shiga T, Maeda M, Yabe H, Yasumura S. Psychometric evaluation of the Japanese  
433 version of the Posttraumatic Stress Disorder Checklist in community dwellers following the Fukushima  
434 Daiichi nuclear power plant incident: the Fukushima health management survey. *SAGE Open.*  
435 2016;6(2): 2158244016652444.

- 436 44. Hoge CW, Castro CA, Messer SC, McGurk D, Cotting DI, Koffman RL. Combat duty in Iraq and  
437 Afghanistan, mental health problems, and barriers to care. *New Eng J Med.* 2004;351(1): 13-22.
- 438 45. Iversen AC, van Staden L, Hughes JH, Browne T, Hull L, Hall J, et al. The prevalence of common  
439 mental disorders and PTSD in the UK military: using data from a clinical interview-based study. *BMC*  
440 *Psychiatry.* 2009;9(1): 68.
- 441 46. MacDonald C, Chamberlain K, Long N. Race, combat, and PTSD in a community sample of New  
442 Zealand Vietnam war veterans. *J Traum Stress.* 1997;10(1): 117-124.
- 443 47. Rona RJ, Jones M, Sundin J, Goodwin L, Hull L, Wessely S, et al. Predicting persistent posttraumatic  
444 stress disorder (PTSD) in UK military personnel who served in Iraq: a longitudinal study. *J Psychiat Res.*  
445 2012;46(9): 1191-1198.
- 446 48. Buckman JEJ, Forbes HJ, Clayton T, Jones M, Jones N, Greenberg N, et al. Early Service leavers: a  
447 study of the factors associated with premature separation from the UK Armed Forces and the mental  
448 health of those that leave early. *Eur J Public Health.* 2012;23(3): 410-415.
- 449 49. Baird T, McLeay S, Harvey W, Theal R, Law D, O'Sullivan R, et al. Sleep disturbances in Australian  
450 Vietnam veterans with and without posttraumatic stress disorder. *J Clin Sleep Med.* 2018;14(5): 745-  
451 752.
- 452 50. Wolgast M. What does the Acceptance and Action Questionnaire (AAQ-II) really measure? *Behav*  
453 *Ther.* 2014;45(6): 831-839.
- 454 51. Vujanovic AA, Niles B, Pietrefesa A, Schmertz SK, Potter CM. Mindfulness in the treatment of  
455 posttraumatic stress disorder among military veterans. *Spiritual Clin Pract.* 2013;1(S): 15-25.
- 456 52. King AP, Erickson TM, Giardino ND, Favorite T, Rauch SAM, Robinson E, et al. A pilot study of group  
457 mindfulness-based cognitive therapy (MBCT) for combat veterans with posttraumatic stress disorder  
458 (PTSD). *Depress Anxiety.* 2013;30(7): 638-645.
- 459 53. Casselman RB, Pemberton JR. ACT-based parenting group for veterans with PTSD: development  
460 and preliminary outcomes. *Am J Fam Ther.* 2015;43(1): 57-66.

461 54. Boyd JE, Lanius RA, McKinnon MC. Mindfulness-based treatments for posttraumatic stress  
462 disorder: a review of the treatment literature and neurobiological evidence. *J Psychiatry Neurosci.*  
463 2018; 43(1): 7-25.

464

465

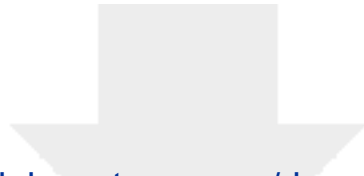

[Click here to access/download](#)

**Supporting Information**

[Strobe checklist Richardson PTS in NZ.docx](#)

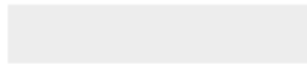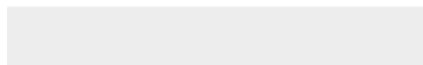

Supplement: pone.0231460.s002.pdf [file pone.0231460.s002.pdf]
